# Supplementary material
Source: PubMed Central journal article supplement (PMC7322040)

## Supplementary Table and Figure Legends

### Supplementary Table S1 siRNA for lncRNA screening

(A) Expression of lncRNAs for functional screening. RPKMs (reads per kilobase per million mapped reads) were calculated from RNA-seq data from LPS-treated BMDMs.

(B) Shown are sequences of siRNA that were used for functional screening of lncRNAs.

### Supplementary Table S2 GSEA analysis of the effects of *lncFAO* knockdown

BMDMs transfected with anti-*lncFAO* (silncFAO #1) or control siRNA as indicated in Fig. 1A were treated with LPS. Twenty-four hours after the LPS treatment, the cells were subjected to polyA RNA-seq, and the RNA-seq data were analyzed using GSEA.

### Supplementary Table S3 GSEA analysis of *lncFAO*<sup>-/-</sup> BMDMs activated with LPS

BMDMs from WT and *lncFAO*<sup>-/-</sup> (KO1) mice were treated with LPS, and RNA was analyzed at the indicated time points using RNA-seq. Shown are FDR < 0.05 MSigDB hallmark gene sets. The gene sets identified at 4 or 5 time points are shown in red. n=3 for each group at each time point.

### Supplementary Table S4 Resolution/repair phase Ly6C<sup>hi</sup> macrophage signature genes

Genes in the gene sets identified in Fig. 2E are shown.

### Supplementary Figure S1 Characterization of *lncFAO*

(A) To screen the function of newly identified lncRNAs, eleven lncRNAs whose expression

we detected in LPS-treated BMDMs were knocked down using specific siRNAs. RNAs were obtained 24 h after LPS treatment, and *Il1a* expression was analyzed using qPCR. \* $P < 0.05$  vs. control siRNA-transfected cells. Tukey-Kramer's post-hoc test.

(B) siRNA-mediated *lncFAO* knockdown. Levels of *lncFAO* mRNA were analyzed in the RNA analyzed in Fig. 1a. mRNA levels were first normalized to those of 18s rRNA and then to the level in untreated control siRNA-transfected BMDMs.  $n=3$ . \* $P < 0.05$  vs. control siRNA at the same time point. Two-tailed unpaired Student's  $t$  test.

(C) RNA was purified from the nuclear and cytoplasmic fractions. Shown are relative *lncFAO* transcript levels in the two fractions.  $n=3$ . Two-tailed unpaired Student's  $t$  test.

(D) Levels of *lncFAO* mRNA in BMDMs and tissues collected from mice in a steady-state. mRNA levels were first normalized to those of 18s rRNA and then to the level in the untreated BMDMs.  $n=3$  for each group. ND, not detected.

(E) Levels of cytokine gene expression in macrophages in myocardial infarction described in Fig. 1D.

## **Supplementary Figure S2 Single-cell RNA-seq analysis of *lncFAO* after myocardial infarction**

(A) Single-cell RNA-seq data sets (ArrayExpress E-MTAB-7376) (1) were integrated using Seurat ver. 3 (2). Expression levels of *lncFAO* and lineage marker genes in 35,192 cells are shown in a t-SNE plot. Most *lncFAO*-expressing cells were found in  $Ptprc^+Itgam^+Cd68^+$  populations.

(B, C) Cell populations expressing *Ptprc*, *Itgam* and *Cd68* were analyzed further. Clustering of the cells and analysis of marker and signature genes revealed 8 subpopulations.

*Ly6c2<sup>hi</sup>Ccr2<sup>hi</sup>Adgre1<sup>int</sup>* cells (cluster 1) appear to correspond to *Ly6C<sup>hi</sup>F4/80<sup>lo</sup>* macrophages (3). *Ly6c2<sup>hi</sup>Ccr2<sup>hi</sup>Adgre1<sup>int</sup>* and two populations of *Ly6c2<sup>int</sup>Msr1<sup>hi</sup>Arg1<sup>+</sup>* cells (cluster 2, 3) expressed *Ccr2* and accumulated 3 days post-MI, suggesting they are monocyte-derived cells recruited through CCR2/CCL2 signaling. *Ly6c2<sup>lo</sup>Adgre1<sup>hi</sup>Cx3cr1<sup>hi</sup>* cells (cluster 4, 5) likely include tissue-resident macrophages in sham hearts (4, 5). After MI, however, these populations also contained *Ccr2<sup>+</sup>* cells, suggesting they include monocyte-derived cells acquiring a tissue-resident macrophage-like phenotype (6). *Ptprc<sup>+</sup>Itgam<sup>+</sup>Cd68<sup>+</sup>* cells also contained minor population of *Lgals3<sup>+</sup>Fabp5<sup>+</sup>* macrophages (cluster 6), *Itgax<sup>+</sup>Cd209a<sup>+</sup>Adgre1<sup>-</sup>* classical dendritic cells (DCs) (cluster 7), and *Ly6c2<sup>lo</sup>Cd64<sup>-/lo</sup>Cd68<sup>lo</sup>Nr4a1<sup>+</sup>* monocytes (cluster 8), which likely correspond to *Ly6C<sup>lo</sup>* patrolling monocytes.

### **Supplementary Figure S3 Characterization of *lncFAO*-expressing subpopulations of macrophages after myocardial infarction**

(A) Expression of macrophage markers and pro- and anti-inflammatory cytokines in the clusters of cells identified in Supplementary Fig. S2 in Sham-operated and day 3 and day 7 post-MI hearts.

(B) Gene ontology enrichment analysis of the more highly expressed genes in *lncFAO*-expressing clusters on day 7 (Cluster 1, 378 genes; Cluster 2, 71 genes). Shown are gene sets with  $q < 10^{-5}$ .

(C) GSEA analysis of the genes differentially expressed in a cluster in comparison to the remaining clusters on day 7. Shown are gene sets with  $q < 0.1$ .

### **Supplementary Figure S4 Generation of *lncFAO*<sup>-/-</sup> mice**

(A) Positions of single guided RNAs (sgRNAs), the deleted region, and the primers for genomic PCR analysis of a *lncFAO*<sup>-/-</sup> line (KO1) are shown schematically. The deleted region is shown as a dotted line.

(B) Genomic PCR of the targeted region in wild-type (WT) mice and in two lines of *lncFAO*<sup>-/-</sup> (KO1 and KO2) mice. The targeted WT allele generated the 950 bp band as depicted in a.

(C) Analysis of the off-target mutations. PCR was performed to amplify three off-target candidate sites, which were predicted by CRISPR Design (<http://crispr.mit.edu/>). After denaturing and reannealing the amplified DNA fragments, they were incubated with Guide-it resolvase (Takara), which recognizes mismatches and cleaves dsDNA at the mismatched sites. The PCR products for off-target sites did not generate cleaved fragments. The amplified DNA fragment of the target region was used as a positive control. Shown are results from the KO1 line.

(D) Body weight changes in male WT and *lncFAO*<sup>-/-</sup> (KO1) mice. There were no significant differences between the two groups at the indicated ages. n=6 for each group. Shown are means ± S.D. Data were analyzed using unpaired Student's *t* test at each age. NS, not significant.

(E) *lncFAO* expression in BMDMs from WT mice and two lines of *lncFAO*<sup>-/-</sup> (KO1 and KO2) mice after LPS treatment. mRNA levels were first normalized to those of 18s rRNA and then to the level in untreated WT BMDMs. n=3. Tukey-Kramer's post-hoc test.

(F) qPCR analysis of *Il6* in BMDMs from WT and the KO2 line of *lncFAO*<sup>-/-</sup> mice. mRNA levels were first normalized to those of 18s rRNA and then to the level in untreated (0 h) WT BMDMs. n=3 for each group. \**P*<0.05 between, two-tailed unpaired Student's *t*-test.

### **Supplementary Figure S5 Nuclear translocation of NF- $\kappa$ B in LPS-treated BMDMs**

Representative micrographs showing immunofluorescent staining of NF- $\kappa$ B p65 (red) in BMDMs treated with LPS for the indicated times. Nuclei were counterstained with DAPI (green). Scale bars, 10  $\mu$ m.

### **Supplementary Figure S6 Effects of *lncFAO* deletion on skin wound healing**

(A) Representative skin wounds 8 days after a skin excision injury.

(B) Representative histological images of skin wounds on day 8 post-injury. Masson's Trichrome staining of sections from mice transplanted with WT or *lncFAO*<sup>-/-</sup> bone marrow. Scale bars, 500  $\mu$ m.

### **Supplementary Figure S7 Identification of *lncFAO* binding proteins**

(A) Image of a silver-stained SDS-PAGE gel. Whole cell lysates of BMDMs left untreated for 24 h or 24 h after LPS treatment were incubated with *in vitro*-transcribed biotinylated *lncFAO* RNA, after which the RNA and binding proteins were pulled down using streptavidin-coated Dynabeads (lanes 2 and 4). As negative controls, lysates of LPS-treated BMDMs were incubated with biotinylated antisense RNA (lane 5) or without biotinylated RNA (lane 3). The band in the orange square was extracted for LC-MS/MS analysis. Lane 1 shows size markers.

(B) Proteins in the excised band indicated in A and detected using LC-MS/MS.

### **Supplementary Figure S8 Pull-down of endogenous *lncFAO* complexes**

Relative abundances of the target and non-target RNAs in samples pulled down with anti-

*lncFAO* oligos as compared to the abundances in the input whole cell lysates. The purified samples and the input whole cell lysates were reverse transcribed, and the abundances of the indicated RNA species were analyzed by qPCR. The results show a specific enrichment of *lncFAO* in the pull down.

### **Supplementary Figure S9 *lncFAO* localization in LPS-treated BMDMs**

*lncFAO* RNA and mitochondrial COX-IV protein were visualized using fluorescent in-situ hybridization (FISH) and immunofluorescent staining in WT-BMDMs left untreated (A) or treated for 24 h with LPS (B). In C, *lncFAO*<sup>-/-</sup> BMDMs were stained as a negative control. Scale bars, 10 μm.

### **Supplementary Figure S10 *Hadhb* knockdown**

Quantitative PCR analysis of *Hadhb* expression in BMDMs transfected with control (siControl) or siRNA targeting *Hadhb* or *lncFAO* as described in Figure 4F (A) and 4G (B). mRNA levels were first normalized to those of 18s rRNA and then to the level in siControl-transfected BMDMs. n=3. In A, \**P*<0.05 vs. siControl. Tukey-Kramer's post-hoc test. In B, \**P*<0.05 vs. siControl at the same time point. Two-tailed unpaired Student's *t* test.

### **Supplementary Figure S11 *Hadhb* knockdown in *lncFAO*<sup>-/-</sup> BMDMs**

BMDMs from WT and *lncFAO*<sup>-/-</sup> mice were transfected with siRNA targeting *Hadhb* or control siRNA. Twenty-four hours after transfection, the cells were treated with LPS.

(A) IL-6 levels in the medium were analyzed 24 h after LPS treatment of WT and *IncFAO*<sup>-/-</sup> BMDMs. n=3. \* $P < 0.05$  vs. siControl of the same genotype, # $P < 0.05$  vs WT of the same siRNA treatment, Tukey-Kramer's post-hoc test.

(B) Quantitative PCR analysis of *Hadhb* expression in BMDMs as described in A. \* $P < 0.05$  vs. siControl of the same genotype, Tukey-Kramer's post-hoc test.

## Refernces

1. Farbehi N, *et al.* (2019) Single-cell expression profiling reveals dynamic flux of cardiac stromal, vascular and immune cells in health and injury. *eLife* 8:e43882.
2. Stuart T, *et al.* (2019) Comprehensive Integration of Single-Cell Data. *Cell* 177(7):1888-1902.e1821.
3. Fujiu K, *et al.* (2017) A heart-brain-kidney network controls adaptation to cardiac stress through tissue macrophage activation. *Nat. Med.* 23(5):611-622.
4. Epelman S, *et al.* (2014) Embryonic and Adult-Derived Resident Cardiac Macrophages Are Maintained through Distinct Mechanisms at Steady State and during Inflammation. *Immunity* 40(1):91-104.
5. Swirski FK & Nahrendorf M (2018) Cardioimmunology: the immune system in cardiac homeostasis and disease. *Nature Reviews Immunology* 18(12):733-744.
6. Dick SA, *et al.* (2019) Self-renewing resident cardiac macrophages limit adverse remodeling following myocardial infarction. *Nat. Immunol.* 20(1):29-39.



## Refernces

1. Farbehi N, *et al.* (2019) Single-cell expression profiling reveals dynamic flux of cardiac stromal, vascular and immune cells in health and injury. *eLife* 8:e43882.
2. Stuart T, *et al.* (2019) Comprehensive Integration of Single-Cell Data. *Cell* 177(7):1888-1902.e1821.
3. Fujiu K, *et al.* (2017) A heart-brain-kidney network controls adaptation to cardiac stress through tissue macrophage activation. *Nat. Med.* 23(5):611-622.
4. Epelman S, *et al.* (2014) Embryonic and Adult-Derived Resident Cardiac Macrophages Are Maintained through Distinct Mechanisms at Steady State and during Inflammation. *Immunity* 40(1):91-104.
5. Swirski FK & Nahrendorf M (2018) Cardioimmunology: the immune system in cardiac homeostasis and disease. *Nature Reviews Immunology* 18(12):733-744.
6. Dick SA, *et al.* (2019) Self-renewing resident cardiac macrophages limit adverse remodeling following myocardial infarction. *Nat. Immunol.* 20(1):29-39.

A

| Gene name     | Gene locus (mm9)                 | RPKM     |        |      |     |
|---------------|----------------------------------|----------|--------|------|-----|
|               |                                  | Baseline | LPS 4h | 24h  | 48h |
| LincRNA_LPS2  | chr10: 66,374,941 - 66,381,731   | 0.3      | 0.9    | 2.4  | 0.8 |
| LincRNA_LPS4  | chr10: 44,315,002 - 44,429,890   | 0.2      | 0.3    | 0.4  | 0.9 |
| LincRNA_LPS5  | chr16: 3,754,741 - 3,763,969     | 0.0      | 0.1    | 0.1  | 0.0 |
| LincRNA_LPS6  | chr6: 86,619,982 - 86,621,267    | 0.1      | 0.2    | 0.1  | 0.6 |
| LincRNA_LPS8  | chr16: 93,128,061 - 93,142,507   | 0.0      | 0.4    | 3.1  | 0.3 |
| LincRNA_LPS9  | chr10: 87,158,901 - 87,159,185   | 0.0      | 0.0    | 1.9  | 2.6 |
| LincRNA_LPS11 | chr11: 117,839,170 - 117,840,370 | 0.0      | 0.9    | 0.4  | 0.1 |
| LincRNA_LPS12 | chr11: 97,523,72 - 97,524,435    | 0.1      | 2.4    | 1.8  | 1.0 |
| LincRNA_LPS18 | chr17: 29,626,262 - 29,627,368   | 2.0      | 1.2    | 2.7  | 2.9 |
| LincRNA_LPS19 | chr19: 12,598,652 - 12,605,701   | 0.0      | 26.3   | 13.2 | 4.3 |
| lncFAO        | chr13: 52,649,726 - 52,668,660   | 3.9      | 0.9    | 12.7 | 6.1 |

B

| Gene name     | Sense                     | Antisense                  |
|---------------|---------------------------|----------------------------|
| LincRNA_LPS2  | GCGAAGGAGAGAGAGAGAAAUCUU  | GCGAAGGAGAGAGAGAGAAATCCTT  |
| LincRNA_LPS4  | UGUGCCCUAUGGAAGAUCUGGAUUA | TGTGCCCTATGGAAGATCTGGATTA  |
| LincRNA_LPS5  | CAGUGAAGGGAAGAAGGAAUGUGCA | CAGTGAAGGGAAGAAGGAATGTGCA  |
| LincRNA_LPS6  | GGGCAUGCCUUGAUGUGAACCUUUA | GGGCATGCCTTGATGTGAACCTTTA  |
| LincRNA_LPS8  | AGGAGGCAAUAGAGCGGCAUCUAAU | AGGAGGCAATAGAGCGGCATCTAAT  |
| LincRNA_LPS9  | GAAGGCCAGAUACACUCCAUCUUCA | GAAGGCCAGATACACTCCATCTTCA  |
| LincRNA_LPS11 | CCCAGAAUUCUAGAAGGCCUCUCUA | UAGAGAGGCCUUCUAGAAUUCUGGG  |
| LincRNA_LPS12 | GAGCUGCUUUGAAACUUCUUACCAA | UUGGUAAGAAGUUUCAAAAGCAGCUC |
| LincRNA_LPS18 | CAUCGUCUUUAGUCCUCAUAGUUU  | AAACUAGAGGACUUAUAGACGAUG   |
| LincRNA_LPS19 | UCUGCCCGGCUAACACCAUUUCUU  | TCTGCCCGGCTAACACCCATTCTT   |

## Supplementary Table S1

| Gene set                          | NES    | FDR q-val |
|-----------------------------------|--------|-----------|
| HYPOXIA                           | 2.3624 | 0.0000    |
| TNFA_SIGNALING_VIA_NFKB           | 2.3437 | 0.0000    |
| INFLAMMATORY_RESPONSE             | 2.2399 | 0.0000    |
| TGF_BETA_SIGNALING                | 2.0193 | 0.0007    |
| KRAS_SIGNALING_UP                 | 1.9961 | 0.0006    |
| IL6_JAK_STAT3_SIGNALING           | 1.9884 | 0.0006    |
| COMPLEMENT                        | 1.9743 | 0.0006    |
| INTERFERON_GAMMA_RESPONSE         | 1.9606 | 0.0005    |
| EPITHELIAL_MESENCHYMAL_TRANSITION | 1.9469 | 0.0005    |
| XENOBIOTIC_METABOLISM             | 1.8900 | 0.0013    |
| ALLOGRAFT_REJECTION               | 1.8679 | 0.0016    |
| P53_PATHWAY                       | 1.8330 | 0.0027    |
| INTERFERON_ALPHA_RESPONSE         | 1.8045 | 0.0034    |
| IL2_STAT5_SIGNALING               | 1.7577 | 0.0057    |
| APOPTOSIS                         | 1.7382 | 0.0066    |
| COAGULATION                       | 1.7301 | 0.0067    |
| REACTIVE_OXIGEN_SPECIES_PATHWAY   | 1.6417 | 0.0148    |
| UV_RESPONSE_DN                    | 1.6287 | 0.0157    |
| HEME_METABOLISM                   | 1.6274 | 0.0151    |
| GLYCOLYSIS                        | 1.5341 | 0.0351    |
| MTORC1_SIGNALING                  | 1.4977 | 0.0455    |
| ESTROGEN_RESPONSE_EARLY           | 1.4911 | 0.0460    |

Supplementary Table S2

## Upregulated in *IncFAO*<sup>-/-</sup>

0 h

| Gene set                   | NES  | FDR q |
|----------------------------|------|-------|
| Myc targets v1             | 2.4  | 0     |
| Myc targets v2             | 2.4  | 0     |
| Unfolded protein response  | 2.14 | 0     |
| Angiogenesis               | 2.11 | 0     |
| Tgf beta signaling         | 2.09 | 0     |
| Tnfa signaling via NFkB    | 1.92 | 0.001 |
| Mtorc1 signaling           | 1.89 | 0.001 |
| Wnt beta catenin signaling | 1.84 | 0.002 |
| Notch signaling            | 1.65 | 0.016 |
| Interferon alpha response  | 1.63 | 0.017 |
| Cholesterol homeostasis    | 1.62 | 0.017 |
| G2M checkpoint             | 1.61 | 0.016 |
| E2F targets                | 1.55 | 0.027 |
| Inflammatory response      | 1.49 | 0.038 |
| Estrogen response early    | 1.48 | 0.037 |
| UV response up             | 1.44 | 0.049 |

12 h

| Gene set                   | NES  | FDR q |
|----------------------------|------|-------|
| Inflammatory response      | 2.26 | 0     |
| Interferon gamma response  | 2.26 | 0     |
| Interferon alpha response  | 2.24 | 0     |
| Allograft rejection        | 2.14 | 0     |
| Tnfa signaling via NFkB    | 2.02 | 0.001 |
| Tgf beta signaling         | 1.78 | 0.02  |
| Mitotic spindle            | 1.78 | 0.017 |
| Wnt beta catenin signaling | 1.65 | 0.044 |

## Downregulated in *IncFAO*<sup>-/-</sup>

0 h

| Gene set             | NES  | FDR q |
|----------------------|------|-------|
| Bile acid metabolism | -0.6 | 0.002 |

12 h

| Gene set | NES   | FDR q |
|----------|-------|-------|
| Hypoxia  | -1.75 | 0.033 |

4 h

| Gene set                   | NES  | FDR q |
|----------------------------|------|-------|
| Interferon alpha response  | 2.57 | 0     |
| Myc targets v1             | 2.47 | 0     |
| Interferon gamma response  | 2.42 | 0     |
| Tnfa signaling via NFkB    | 2.34 | 0     |
| Inflammatory response      | 2.07 | 0     |
| MTORC1 signaling           | 2.06 | 0     |
| Unfolded protein response  | 2.02 | 0     |
| Allograft rejection        | 2.01 | 0     |
| UV response up             | 1.76 | 0.003 |
| Wnt beta catenin signaling | 1.73 | 0.004 |
| IL2 STAT5 signaling        | 1.69 | 0.006 |
| Myc targets v2             | 1.67 | 0.007 |
| Oxidative phosphorylation  | 1.65 | 0.008 |
| Complement                 | 1.6  | 0.013 |
| Notch signaling            | 1.48 | 0.039 |
| IL6 JAK STAT3 signaling    | 1.45 | 0.049 |

24 h

| Gene set                  | NES  | FDR q |
|---------------------------|------|-------|
| Interferon gamma response | 2.29 | 0     |
| Interferon alpha response | 2.22 | 0     |
| Inflammatory response     | 2.18 | 0     |
| Allograft rejection       | 1.96 | 0.001 |

4 h

| Gene set | NES | FDR q |
|----------|-----|-------|
| None     |     |       |

24 h

| Gene set | NES | FDR q |
|----------|-----|-------|
| None     |     |       |

8 h

| Gene set                  | NES  | FDR q |
|---------------------------|------|-------|
| Inflammatory response     | 2.03 | 0     |
| Tnfa signaling via NFkB   | 2    | 0     |
| Myc targets v1            | 1.93 | 0     |
| Myc targets v2            | 1.89 | 0.002 |
| Allograft rejection       | 1.84 | 0.004 |
| Unfolded protein response | 1.82 | 0.003 |
| IL2 STAT5 signaling       | 1.65 | 0.018 |
| Mitotic spindle           | 1.65 | 0.016 |

8 h

| Gene set              | NES   | FDR q |
|-----------------------|-------|-------|
| Hypoxia               | -1.73 | 0.042 |
| Xenobiotic metabolism | -1.68 | 0.037 |
| Heme metabolism       | -1.64 | 0.039 |
| Glycolysis            | -1.63 | 0.031 |

### **Cardiac Ly6c<sup>hi</sup> day 7 post-MI upregulated genes**

*Ly6a, Slamf9, Klf4, Cav1, Ctla2a, Sh2d1b1, Snhg12, Ccdc88c, Sema4d, Rnase6, Icam2, Cx3cr1, Rgs2, Rbks, Hhex, Stat1, Batf3, Ifi203, Spn, Epsti1, Grk3, Dusp2, Pttg1, Clec2i, Ace, Fh1, Myo1g, Cdc42ep3, Gsto1, Ly6c1, Pdlim1, Rasa4, Klf2, Sparcl1, Lmo4, Bmyc, Ckb, Gng11, Rasgrp2, Cbfa2t3, Irf1, Ramp1, Hscb, Hmgb2, H1f0, Hspb1, Lpl, Nfe2, Cd81, Susd3, Rbfa, Nsmce4a, Cd74, Igfbp7, Col3a1, Mef2c, Igfbp1, Calhm2, Racgap1, Pmaip1, Tuba1a, Surf1, Tsc22d1, Gpr141, Slamf8, Mgp, Mbp, Dcn, Gimap6, Rogdi, Arl5c, Aw112010, Nedd9, Sparc, Rnf166, Arhgap15, Ogt, Rp9, Tifa, Tm4sf1, Fabp4, Cd36, Gstp1, Mettl7a1, Gpx3, Pou2f2, Chst12, Bgn, Tmcc1, Limd2, Arhgap17, Ciita, Ldlrad3, Cyp27a1, Ptpro, Fcgrt, Ppfia4, Hfe, Tmem176a, Ypel3, Pltp, Lyl1, Ccng2, Igfbp4, Il16, St8sia4, Hpgd*

### **Cardiac Ly6c<sup>hi</sup> day 7 post-MI downregulated genes**

*Plaur, Slc39a14, Trem1, Ccl2, Cd300lf, Slc16a3, Ccl7, Eif1a, Ddx21, Chd7, Tubb6, Map2k3, Slc2a1, Fkbp5, Uck2, Furin, Sdc4, B4galt5, Adora2b, Hyou1, Spint1, Smox, Cd44, Plk3, Slpi, Snx18, Tgm2, Ehd1, Plec, Ccr1, Txnrd1, Rhov, Phlda1, C5ar1, Liltr4b, Rab7b, Srxn1, Hif1a, Card19, Lrrc59, Fam129b, Hmox1, Basp1, Dnaj1, Gpat3, Notch2, Cxcl2, Psmc1, Dok2, Arg1, Gcnt2, Manf, S100a11, Rab20, Ifi207, Rap2b, Nars, Slc7a11, Chil3, Adam8, Kdm6b, Creld2, Clec4e, Fcgr1, Nab2, Myh9, Wfdc21, Tarm1, Chordc1, Dmkn, Mt1, Sdf2l1, Ist1, Hnrnpm, Tuba1c, Slfn2, Ldha, Actb, Thbs1, Emilin2, Gk, Lcn2, Spp1, Lmnbl, Hp, S100a8, Cstb, Ctsl, Ms4a6d, Actr2, Rnh1, Tpm4, Msr1, Picalm, Slc15a3, Il1rn, Por, Vcan, Osm, Clec4d, Atp1a1, Hspa5, Mafb, Slc39a1, Cd14, Ctsd, Saa3, Ier3, Il4ra, Rrbp1, Tpd52, Alkbh5, Lrg1, Ctsb, Igfbp6, Hsp90b1, Ninj1, Bst1, Clec4n, Pdia6, Plek, Bcl2l11, F10, Itgam, Fbxl5, Eps8, S100a9, Srgn, Mdfic, Alas1, Myof, Stab1, Lgmn, Ccr5, Egr1, Ecm1, Gda, Mxd1, Wfdc17, Ptpn1, Mmp19, Maf, Ptafr, Mmp8*

### **Skeletal muscle Ly6C<sup>hi</sup> day 4 post-injury signature genes**

*Mcm2, Spsb1, Fads2, Pick1, Tbrg1, Atp6v0a2, Pigo, Mcm5, Lrrc40, Hmgn2, Cdca7l, Mcm7, Rab2b, Slfn9, Zdhhc24, Pmpca, Phax, Ppcdc, Dnase1l3, Wars2, Cbx5, Snx19, Psm13, Rbl1, H2-t24, Aplnr, Znfx1, Chml, Recql5, Lclat1, Fadd, Dhhdh, Chchd5, Fam122b, Nicn1, Mad2l1, Smarcd1, Slc46a1, Crbn, Cd99l2, Atp1b1, Cenpo, Acsm3, Pnpla6, Tmem229b, Pigb, Galns, Pmm2, Dctn5, Kif9, Klhl6, Tst, Nid2, Usp11, Tubb5, Zfp398, Mtmr4, Zkscan3, Ppip5k1, Rbbp9, Surf2, Kif18b, Il18bp, Spns3, Eri2, Pcp4l1, Asf1b, Uhmkl, Med22, Tbck, Pigh, Aldh7a1, Fbxo25, Rab11b, Fancg, Man2c1, Tbl1x, Mbd4, Surf1, Apod, Mfap3, Scd2, Plekhh1, Map3k12, Cnot6l, Gatac, Zhx1, Btd2, Poc1b, Zc3h12d, Cd37, Trit1, Rad50, Glb1, Ccdc6, Leprot, Bsc12, Ift122, Xpc, Casp9, Plbd2, Adcy3, Oxa1l, Dars2, Map3k4, Siae, Ccni, Cdk5rap2, Znr2, Mettl7a1, Abl1, Ube4b, Slc29a3, Chek2, Pld3, Crat, Naglu, Calcoco1, Ap3b1, Pdk2, Os9, Ezh1, Nbr1, Lmf2, Ccpg1, Plxnc1, Sft2d2*

A

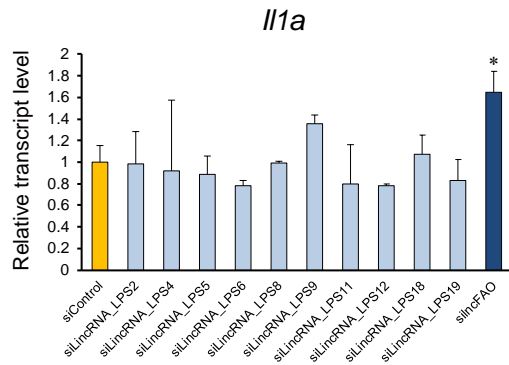

B

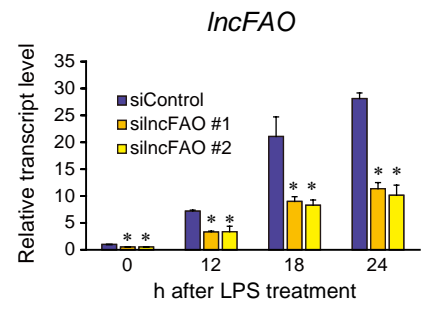

C

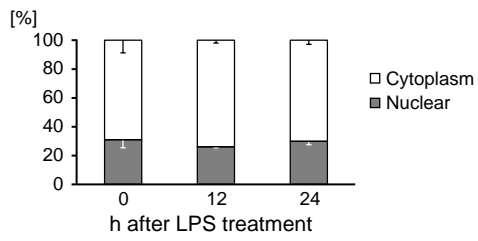

D

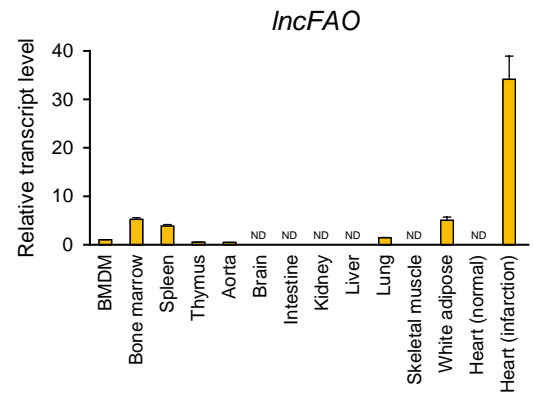

E

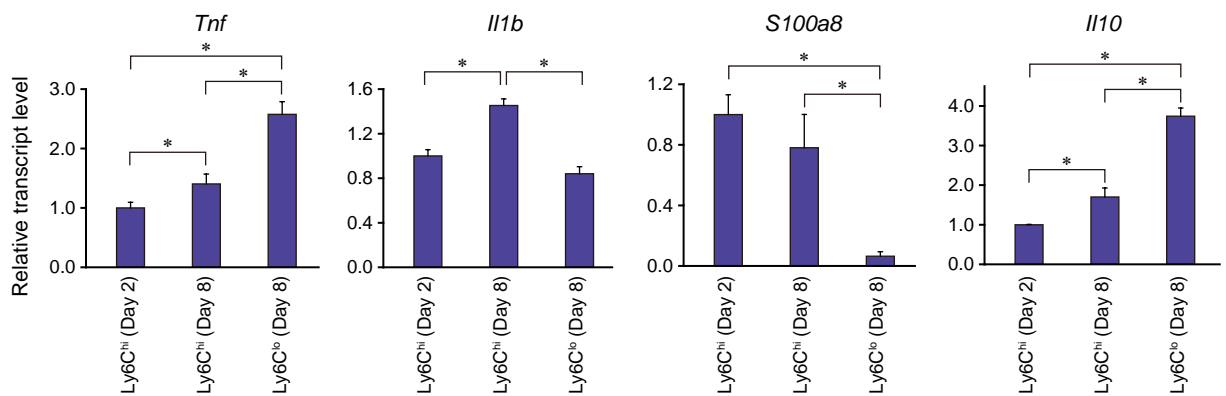

Supplementary Figure S1

A

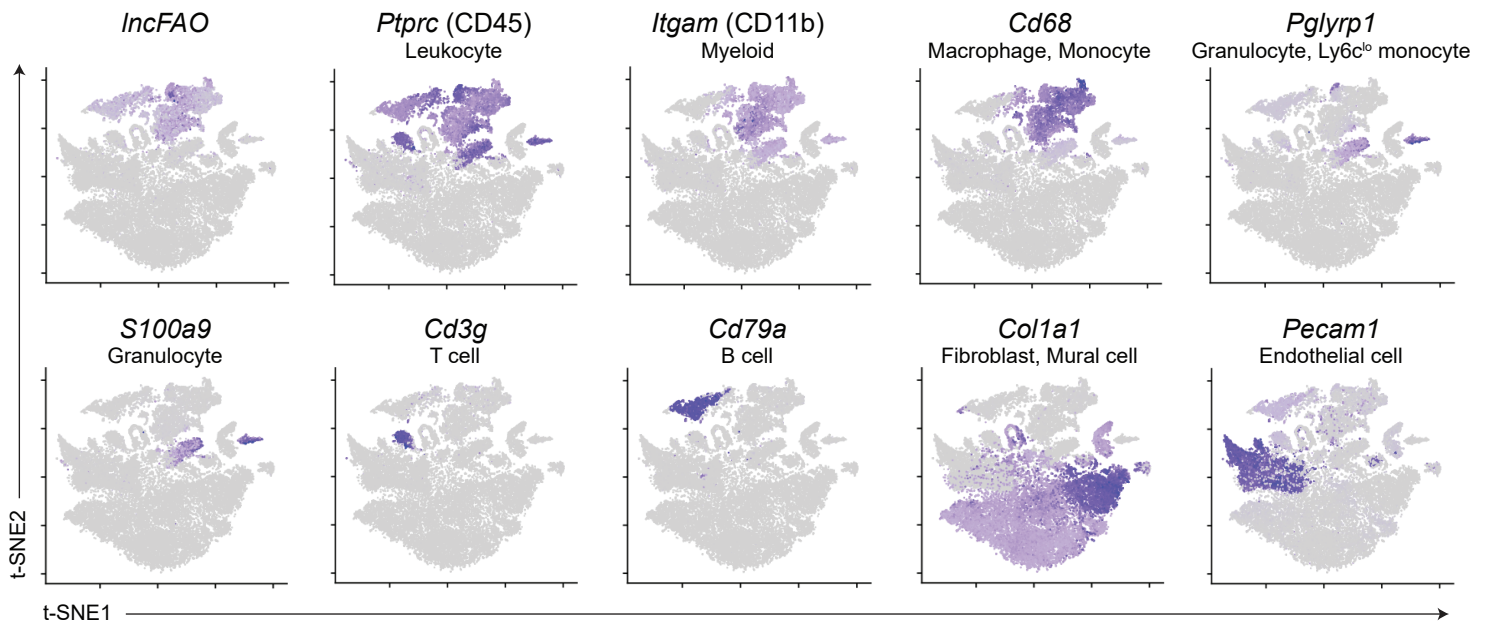

B

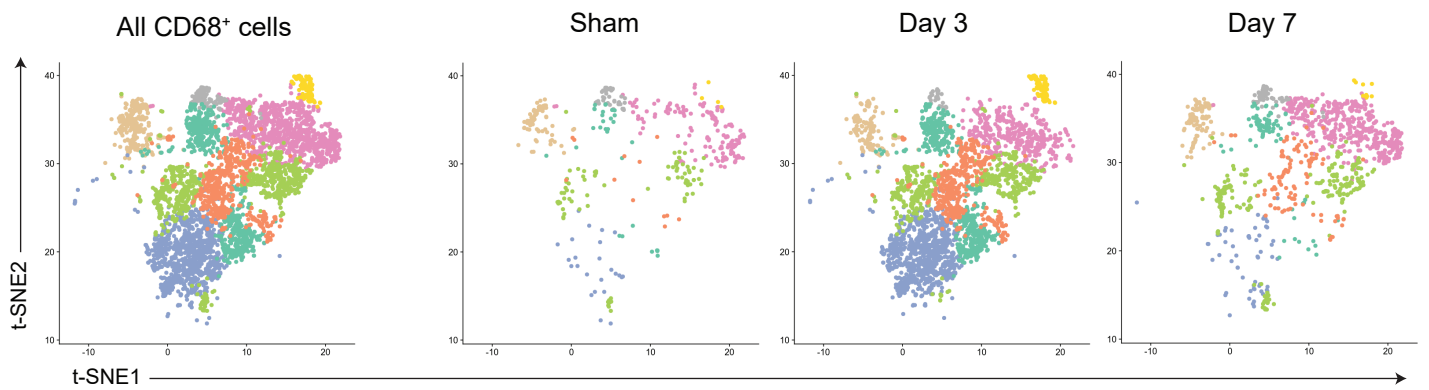

C

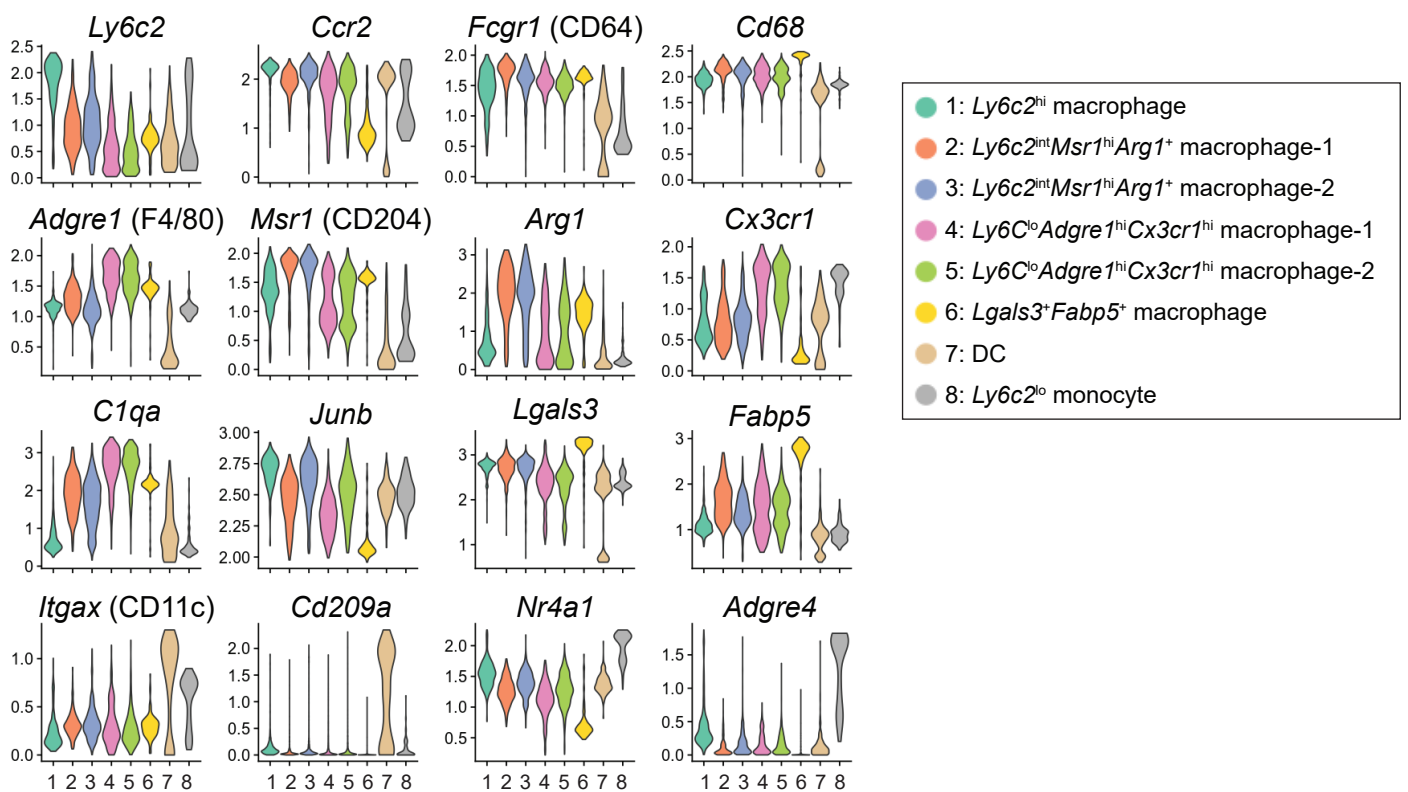

Supplementary Figure S2

A

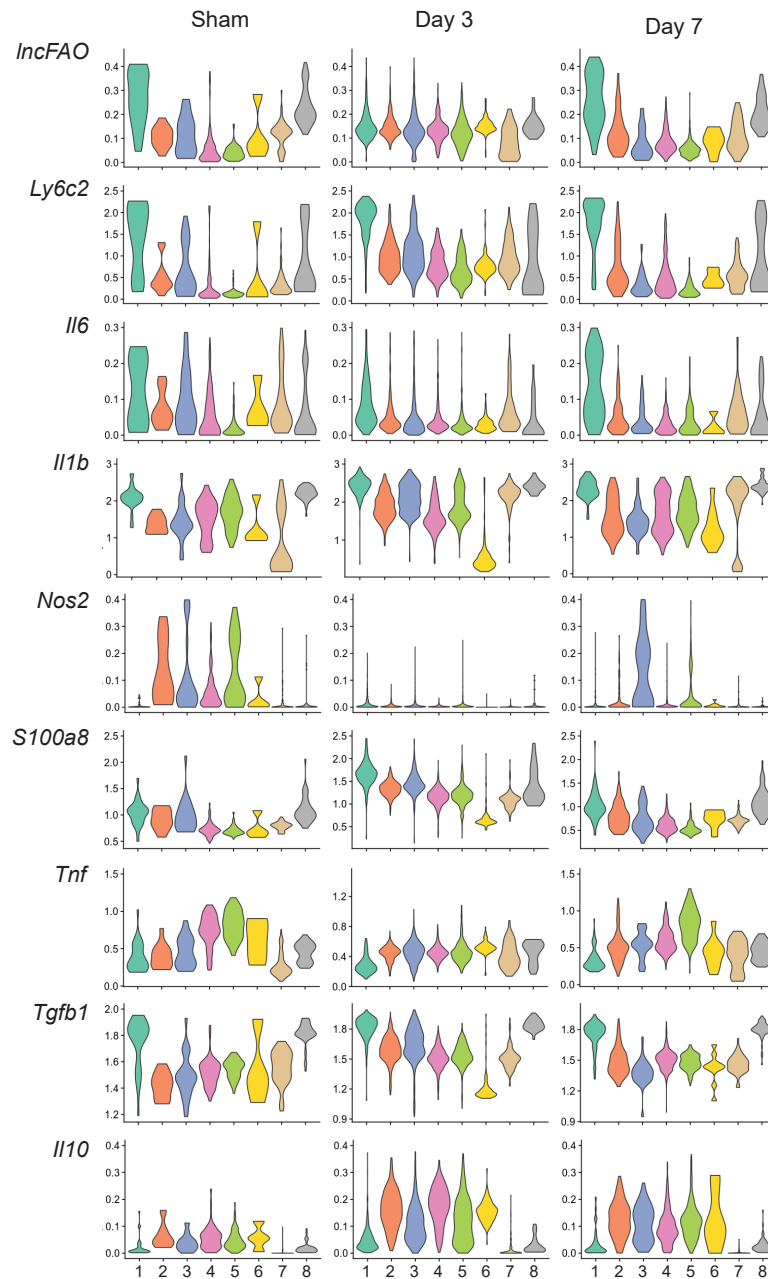

B

| Cluster 1 at day 7 |                                              |              |
|--------------------|----------------------------------------------|--------------|
| Term               | Description                                  | Log(q-value) |
| R-MMU-6798695      | Neutrophil degranulation                     | -20.179      |
| GO:0006954         | Inflammatory response                        | -11.392      |
| R-MMU-109582       | Hemostasis                                   | -10.798      |
| GO:0097529         | Myeloid leukocyte migration                  | -10.668      |
| GO:0007159         | Leukocyte cell-cell adhesion                 | -10.484      |
| GO:0002683         | Negative regulation of immune system process | -7.800       |
| GO:0006909         | Phagocytosis                                 | -7.375       |
| mmu04380           | Osteoclast differentiation                   | -7.108       |
| GO:0045123         | Cellular extravasation                       | -6.225       |
| GO:0048514         | Blood vessel morphogenesis                   | -6.127       |
| GO:0002695         | Negative regulation of leukocyte activation  | -5.763       |
| GO:0070372         | Regulation of ERK1 and ERK2 cascade          | -5.479       |
| GO:0072593         | Reactive oxygen species metabolic process    | -5.417       |
| GO:0019221         | Cytokine-mediated signaling pathway          | -5.398       |
| GO:0097190         | Apoptotic signaling pathway                  | -5.398       |
| GO:0002274         | Myeloid leukocyte activation                 | -5.398       |
| GO:0034341         | Response to interferon-gamma                 | -5.208       |
| GO:0042060         | Wound healing                                | -5.050       |
| GO:0051051         | Negative regulation of transport             | -5.050       |

| Cluster 2 at day 7 |                             |              |
|--------------------|-----------------------------|--------------|
| Term               | Description                 | Log(q-value) |
| GO:0097529         | Myeloid leukocyte migration | -15.745      |
| R-MMU-6798695      | Neutrophil degranulation    | -10.758      |
| GO:0071674         | Mononuclear cell migration  | -7.763       |
| GO:0001525         | Angiogenesis                | -6.652       |
| GO:0042060         | Wound healing               | -6.476       |
| GO:0030155         | Regulation of cell adhesion | -5.931       |

C

| Cluster 1 at day 7              |      | Cluster 2 at day 7 |      |
|---------------------------------|------|--------------------|------|
| Term                            | NES  | Term               | NES  |
| Oxidative phosphorylation       | 2.01 | Mtorc1 signaling   | 1.85 |
| Reactive oxygen species pathway | 1.93 | Myc targets v1     | 1.63 |
| Complement                      | 1.86 | Glycolysis         | 1.62 |
| Interferon gamma response       | 1.82 |                    |      |
| Allograft rejection             | 1.74 |                    |      |
| Cogagulation                    | 1.65 |                    |      |
| Cholesterol homeostasis         | 1.63 |                    |      |
| Il2 stat5 signaling             | 1.59 |                    |      |

FDR <0.05  
FDR >0.05, <0.1

Supplementary Figure S3



A

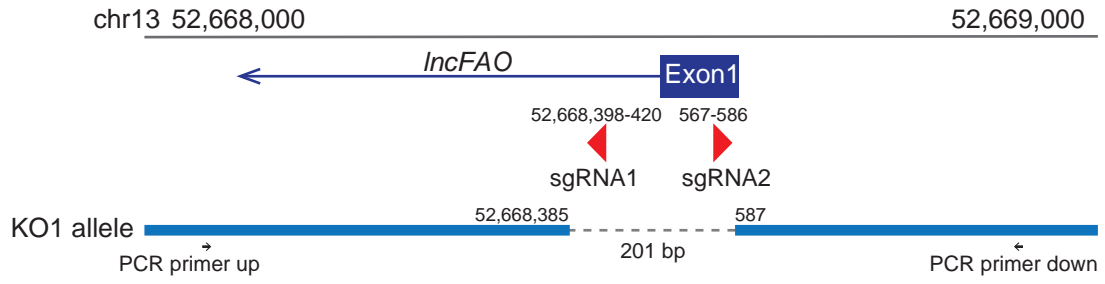

B

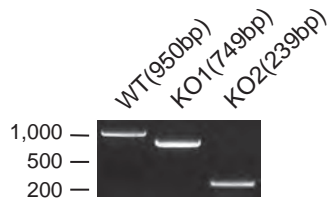

C

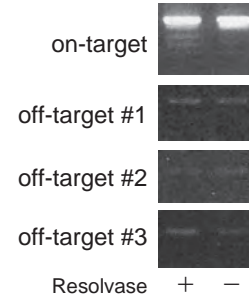

D

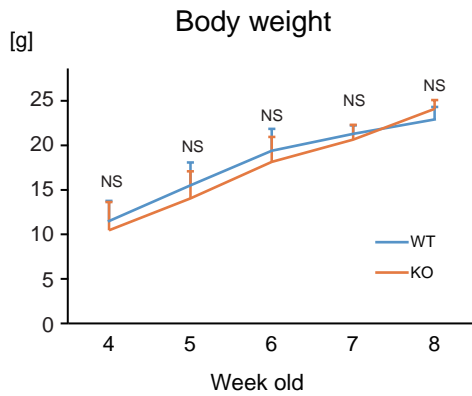

E

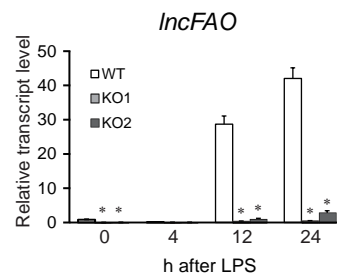

Supplementary Figure S4

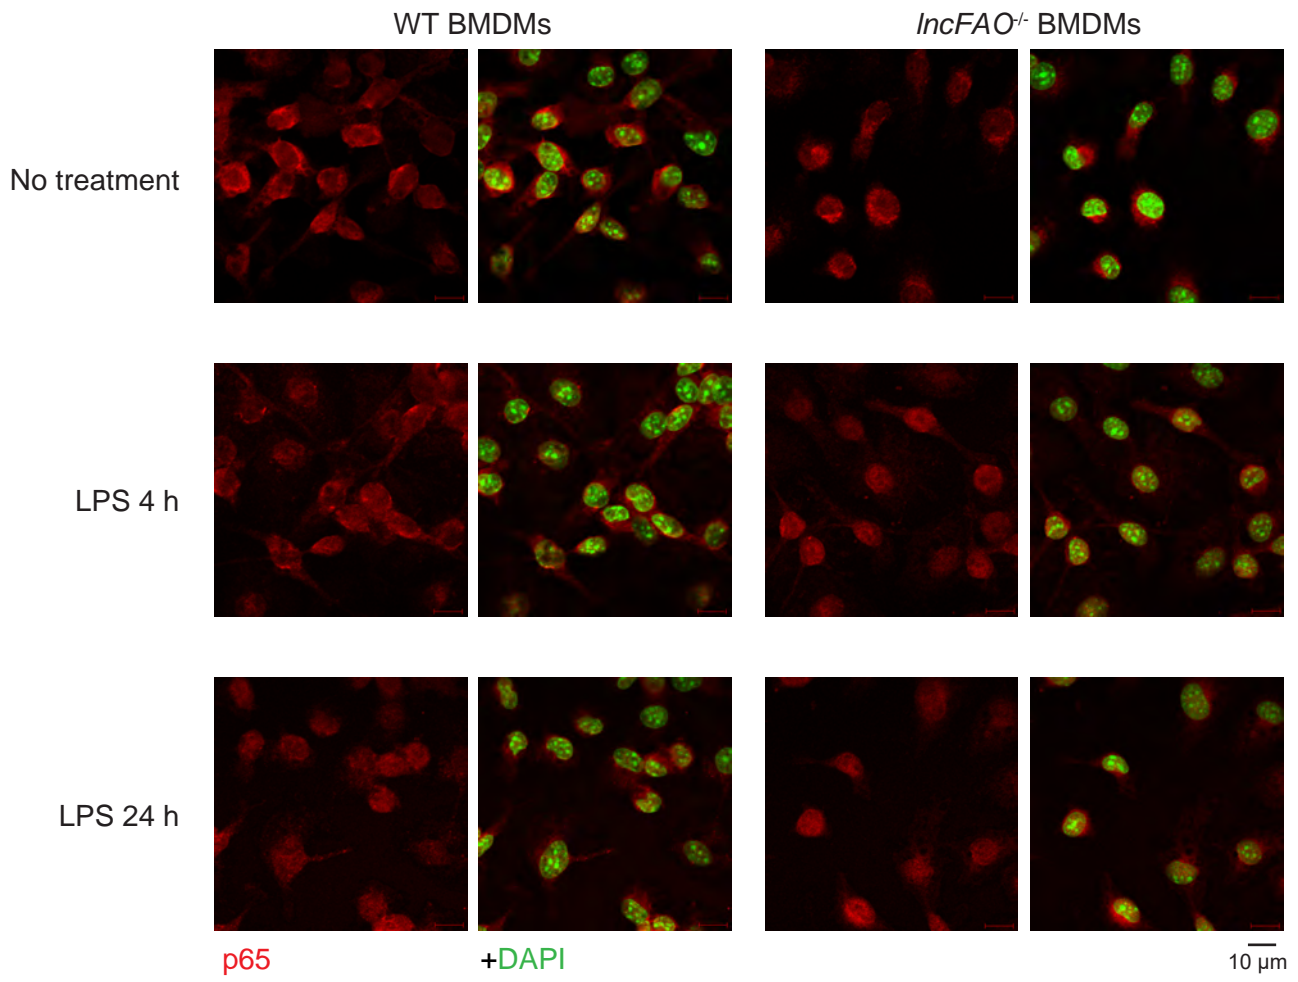

Supplementary Figure S5

A

WT-BMT

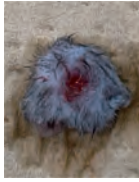

*IncFAO*<sup>-/-</sup>-BMT

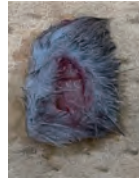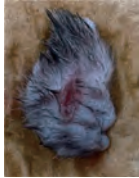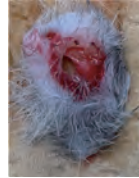

B

WT-BMT

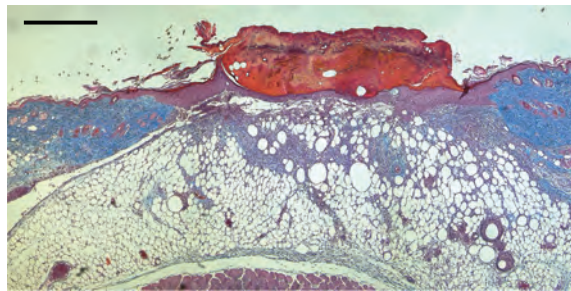

*IncFAO*<sup>-/-</sup>-BMT

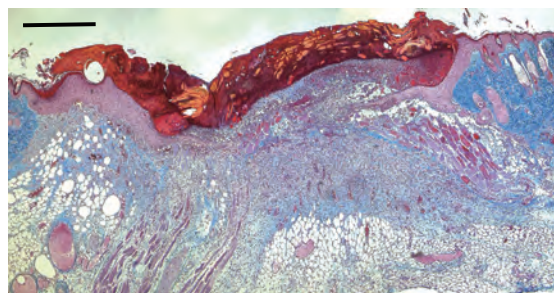

Supplementary Figure S6

A

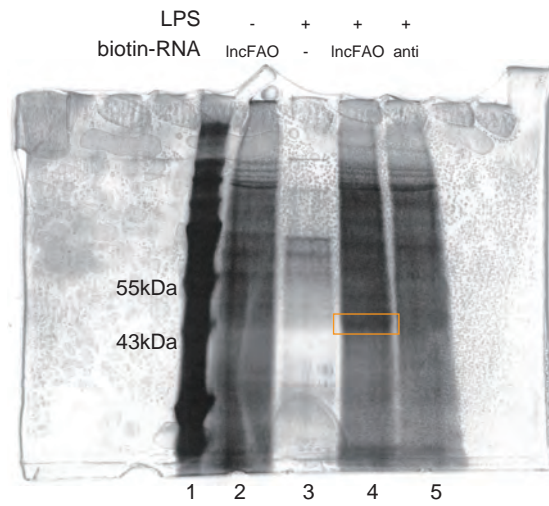

B

| Protein  | probability | Coverage | % spectra |
|----------|-------------|----------|-----------|
| HADHB    | 100%        | 36%      | 2.6%      |
| hnRNPA/B | 100%        | 11%      | 0.48%     |
| Keratin  | 100%        | 4-29%    | 0.48-2.1% |
| Actin    | 100%        | 32-53%   | 2.7-4.2%  |

Supplementary Figure S7

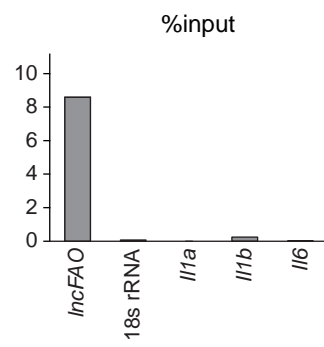

Supplementary Figure S8

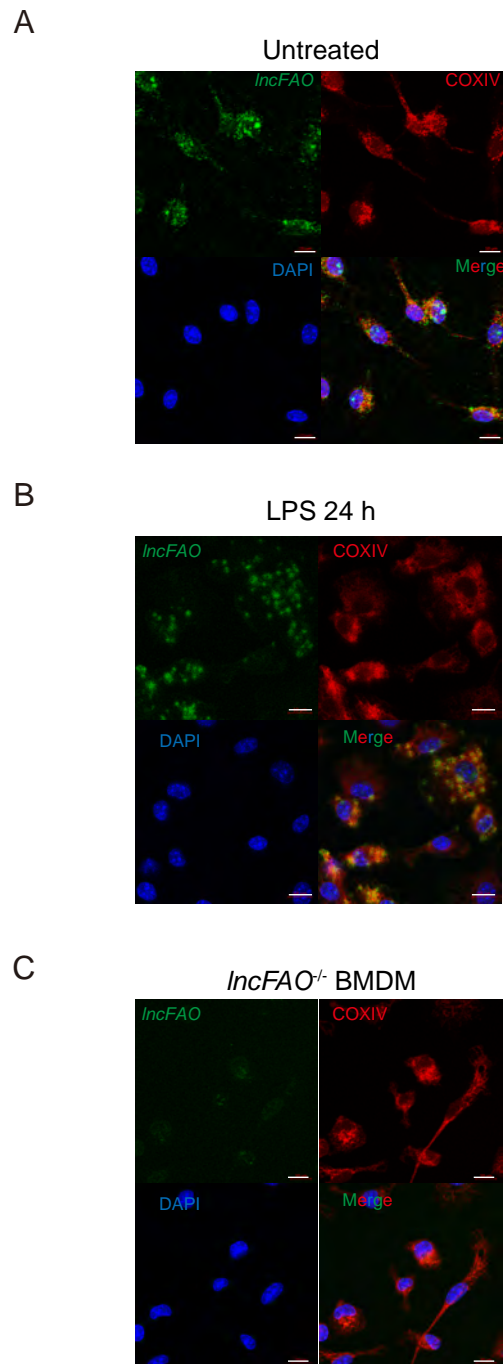

Supplementary Figure S9

A

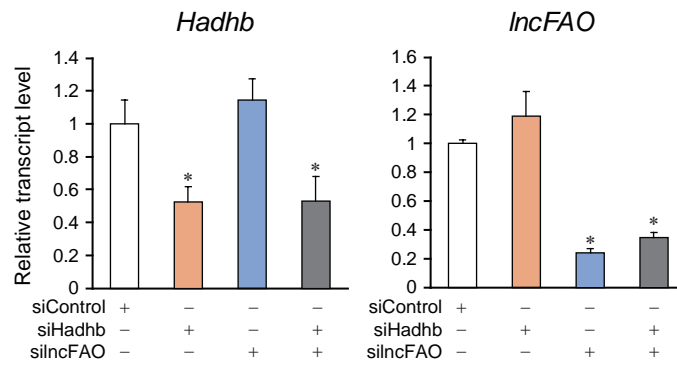

B

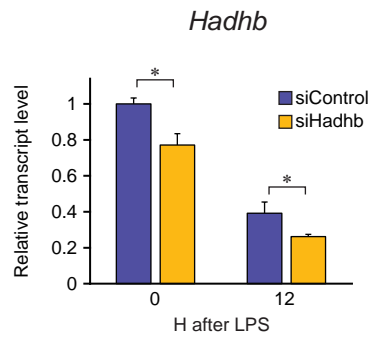

A

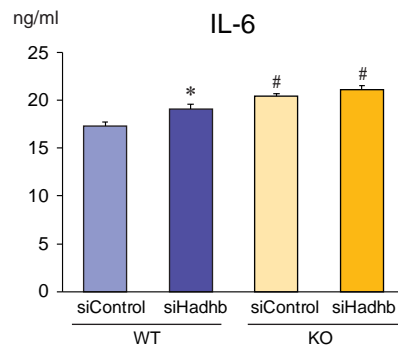

B

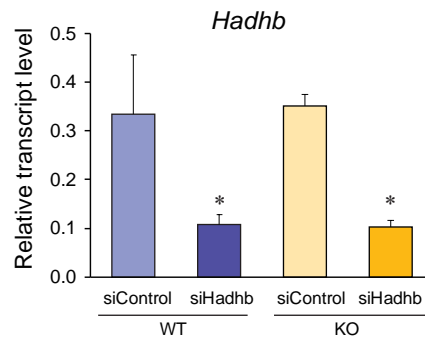

Supplement: pnas.2005924117.sapp.pdf [file pnas.2005924117.sapp.pdf]
